# Supplementary material for: The colorimetric detection of Pb2+ by using sodium thiosulfate and hexadecyl trimethyl ammonium bromide modified gold nanoparticles
Source: Royal Society of Chemistry journal article supplement (doi:10.1039/c3dt32532f), 2013-01-01
Supplement: c3dt32532f.pdf [file c3dt32532f.pdf]

Electronic Supplementary Material

**A colorimetric detection of  $\text{Pb}^{2+}$  by using sodium thiosulfate and hexadecyl thimethyl ammonium  
bromide modified gold nanoparticles**

Yujie Zhang,<sup>a</sup> Yumin Leng,<sup>a</sup> Lijing Miao,<sup>a</sup> Junwei Xin<sup>a</sup> and Aiguo Wu<sup>\*a</sup>

<sup>a</sup>Key Laboratory of Magnetic Materials and Devices, and Division of Functional Materials and Nanodevices, Ningbo Institute of Materials Technology & Engineering (NIMTE), Chinese Academy of Sciences, Ningbo, 315201, China

\*Corresponding author. Tel.: +86-574-86685039, Fax: +86-574-86685163, E-mail: [aiguo@nimte.ac.cn](mailto:aiguo@nimte.ac.cn)

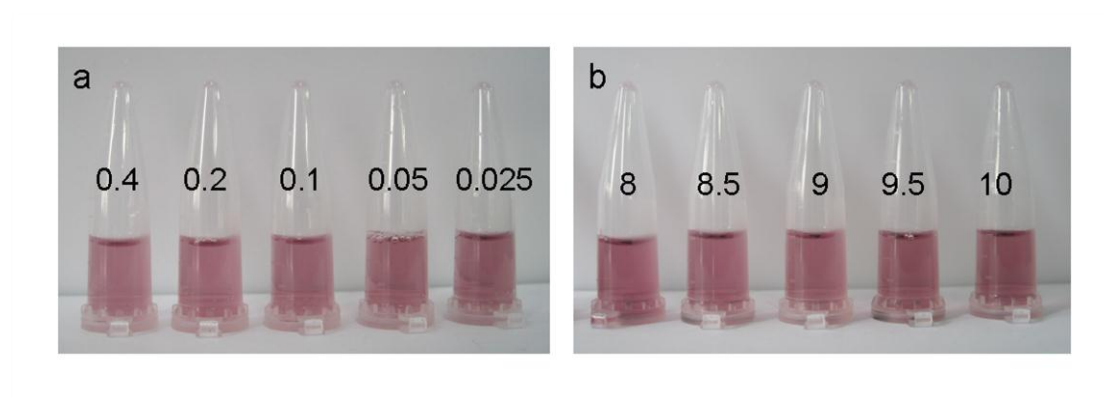

**Fig. S1** (a) Effect of the concentration of  $\text{Na}_2\text{S}_2\text{O}_3$  on the color of Au NPs solutions in the presence of  $10\ \mu\text{M}\ \text{Pb}^{2+}$  ( $[\text{Na}_2\text{S}_2\text{O}_3]=0.4, 0.2, 0.1, 0.05, 0.025\ \text{M}$ ) (b) Effect of pH on the color of Au NPs solutions in the presence of  $3\ \mu\text{M}\ \text{Pb}^{2+}$  (pH=8, 8.5, 9, 9.5, 10).

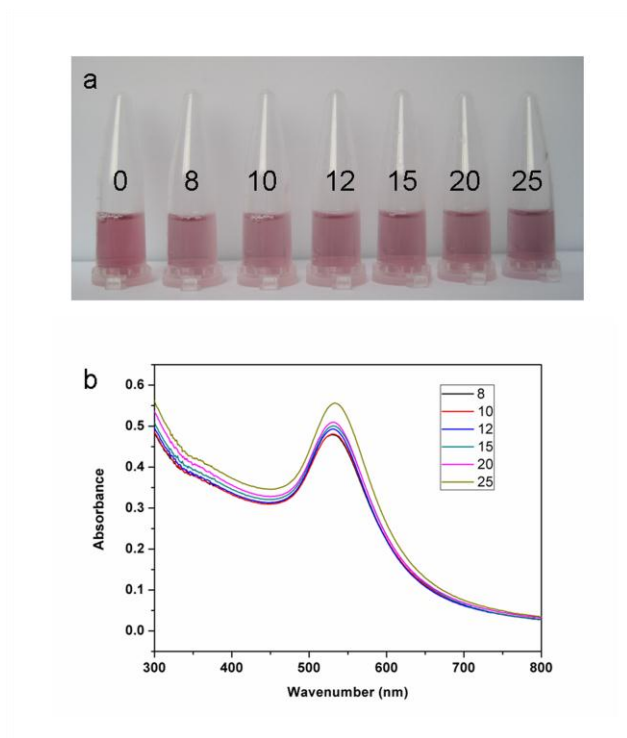

**Fig. S2** (a) The corresponding photo images (b) UV-vis absorption spectra of samples with different concentrations of  $\text{Pb}^{2+}$  (8, 10, 12, 15, 20, 25  $\mu\text{M}$ ).

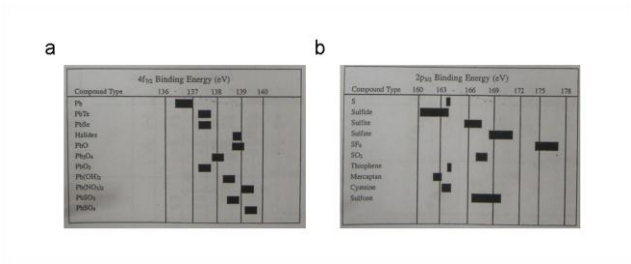

**Fig. S3** XPS data of Pb (a) and S (b).

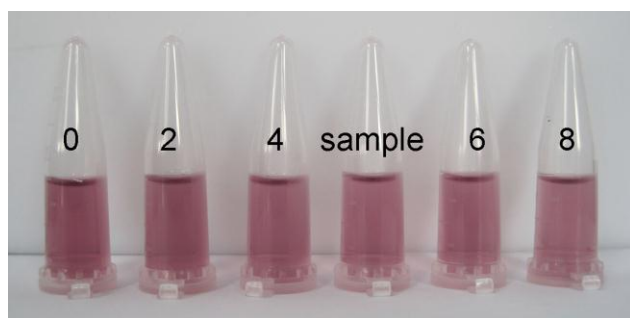

**Fig. S4** The photo images of CTAB-Au solutions in the presence of  $\text{Pb}^{2+}$  with different concentrations (blank, 2  $\mu\text{M}$ , 4  $\mu\text{M}$ , sample, 6  $\mu\text{M}$ , 8  $\mu\text{M}$ ).
